# Supplementary material
Source: PubMed Central journal article supplement (PMC1618101)
Supplement: 7601361s1.pdf [file 7601361s1.pdf]

## Supplementary Material

### Evidence for transmembrane H<sup>+</sup> transfer in a dihaem-containing membrane protein complex

M. G. Madej<sup>1</sup>, H. R. Nasiri<sup>2</sup>, N.S. Hilgendorff<sup>1</sup>, H. Schwalbe<sup>2</sup>, C. R. D. Lancaster<sup>1\*</sup>

<sup>1</sup>Max Planck Institute of Biophysics, Dept. of Molecular Membrane Biology, Max-von-Laue-Str. 3, 60438 Frankfurt/M.,

<sup>2</sup>Institut für Organische Chemie und Chemische Biologie, Center for Biomolecular Resonance, Johann Wolfgang Goethe-Universität, Max-von-Laue-Str. 7, 60438 Frankfurt/M., Germany.

#### 1. Supplementary Figures and Legends

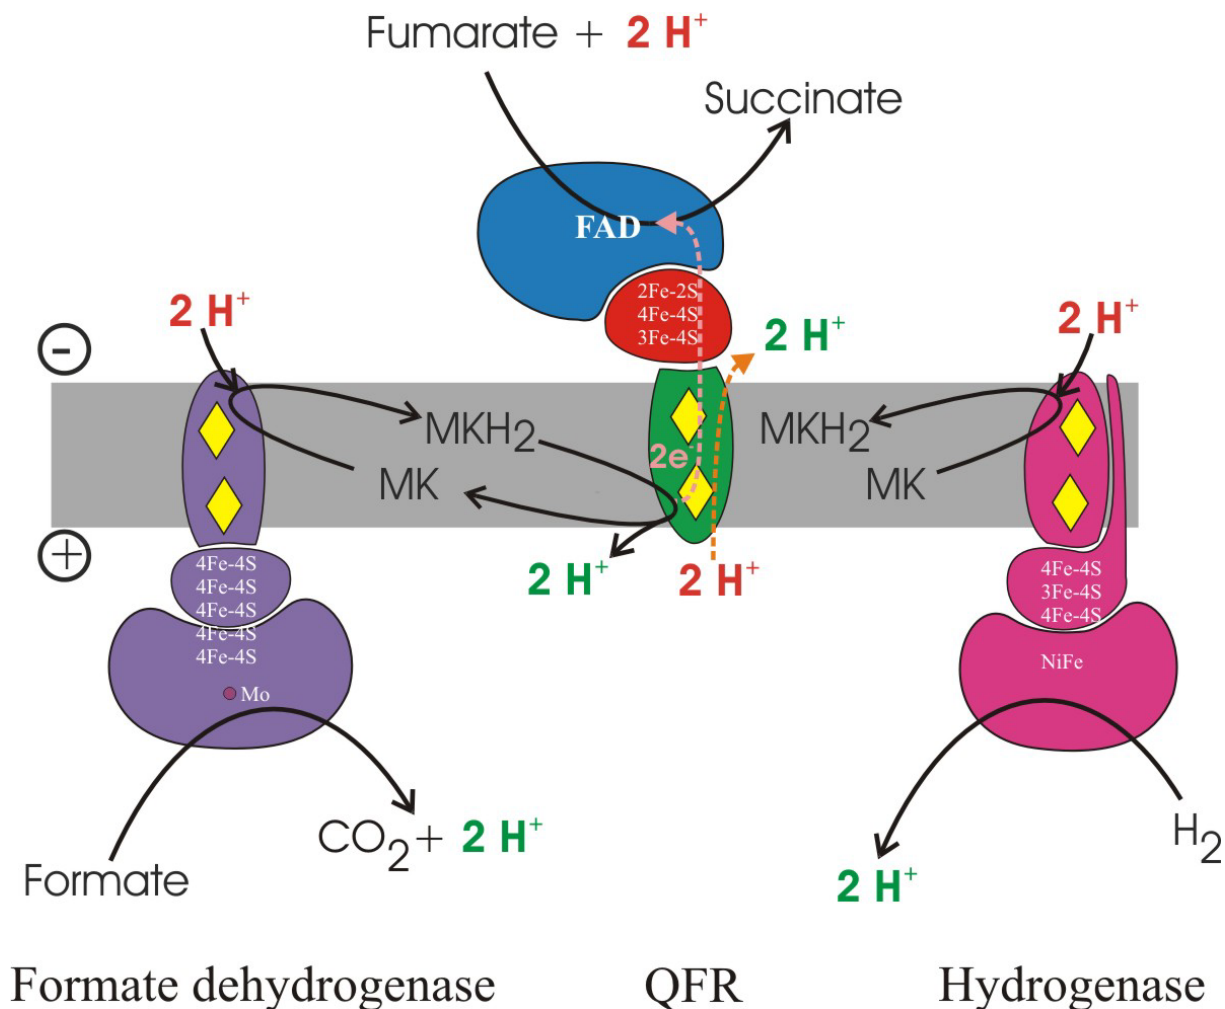

**Figure S1.** Electron and proton transfer in *W. succinogenes* fumarate respiration. Formate dehydrogenase is shown in purple, hydrogenase in pink. QFR subunits are colour-coded in blue (A subunit), red (B subunit) and green (C subunit). Haem groups are symbolised as yellow diamonds. Positive and negative sides of the membrane are the periplasm and the cytoplasm, respectively. Protons bound are shown in red, protons released in green.

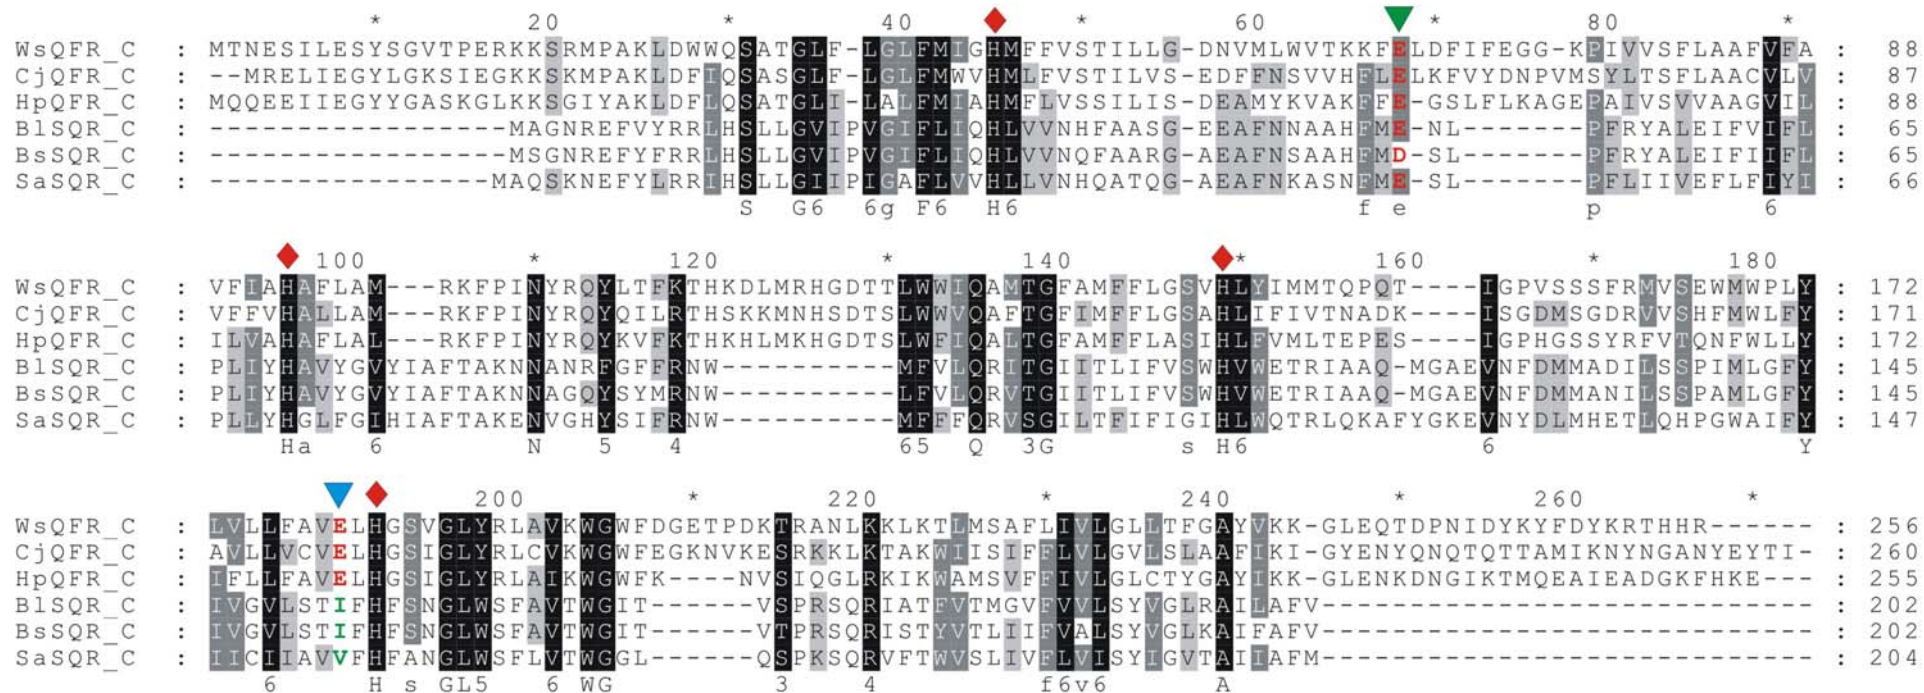

**Figure S2. Sequence alignment.** C-subunit sequence alignment of dihaem-containing succinate:menaquinone oxidoreductase enzymes from different species. QFR sequences from  $\epsilon$ -proteobacteria (Ws: *W. succinogenes*, Cj: *C. jejuni*, Hp: *H. pylori*) and SQR sequences from Gram-positive bacteria (Bl: *B. licheniformis*, Bs: *B. subtilis*, Sa: *S. aureus*) were aligned with T-Coffee (Notredame *et al*, 2000) and viewed and edited using GeneDoc (Nicholas *et al*, 1997). Residues highlighted in black, dark grey and light grey are 100 %, 80 % and 60 % conserved respectively. The His ligands to the haem groups are indicated by red diamonds. The essential acidic constituent, labelled in red, of the menaquinol oxidation site is indicated with a green arrow. The most prominent acidic component of the E-pathway is indicated by a blue arrow. This residue is not conserved in SQRs, as labelled in green.

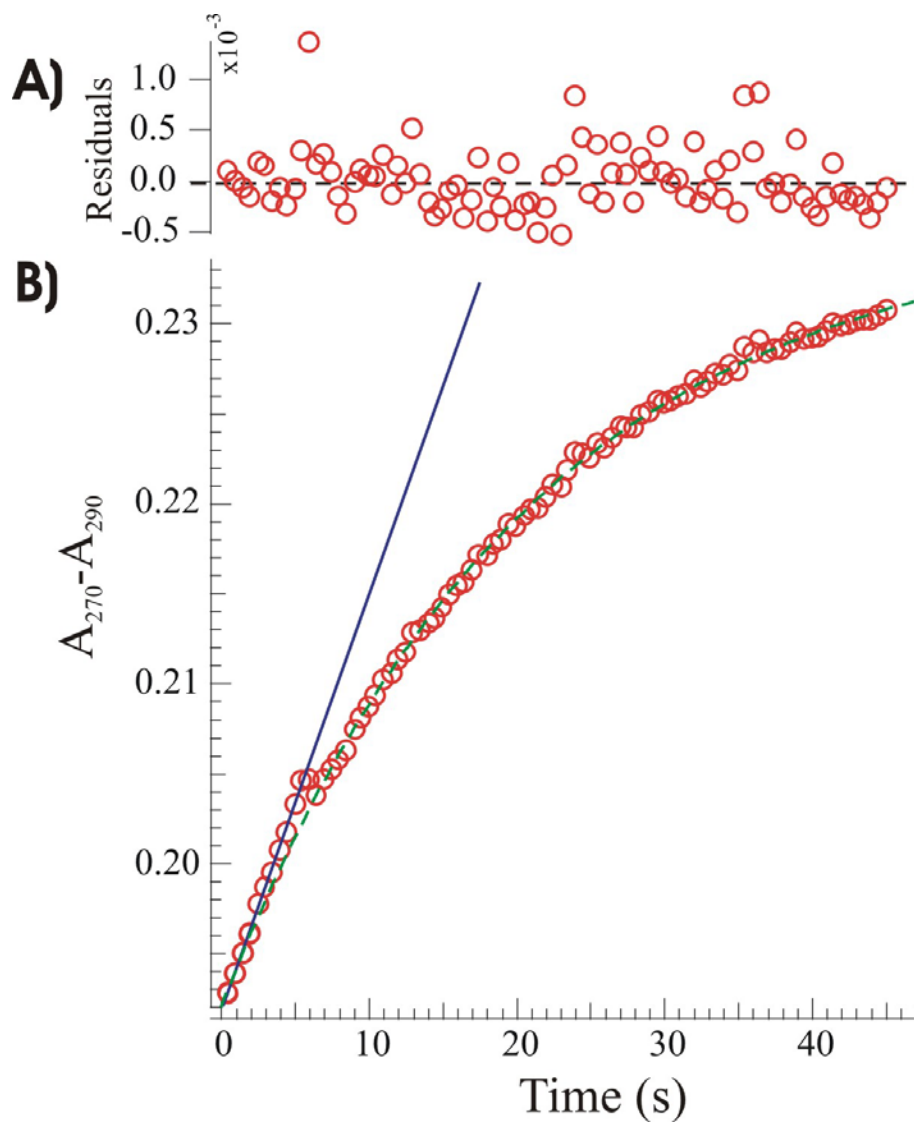

**Figure S3. Enlargement of right half of Figure 1 C (after the addition of the uncoupler CCCP)**

**A)** Residual plot for the fit in panel B.

**B)** Enlargement of right half of Figure 1 C (after the addition of the uncoupler CCCP). The data points  $\Delta A(t)$  were fitted (blue) to the linear model equation S1 (see Supplementary Table SII; shown as blue line; points 0-22) and an exponential model equation S2 (shown as green dashed line; points 23-end).

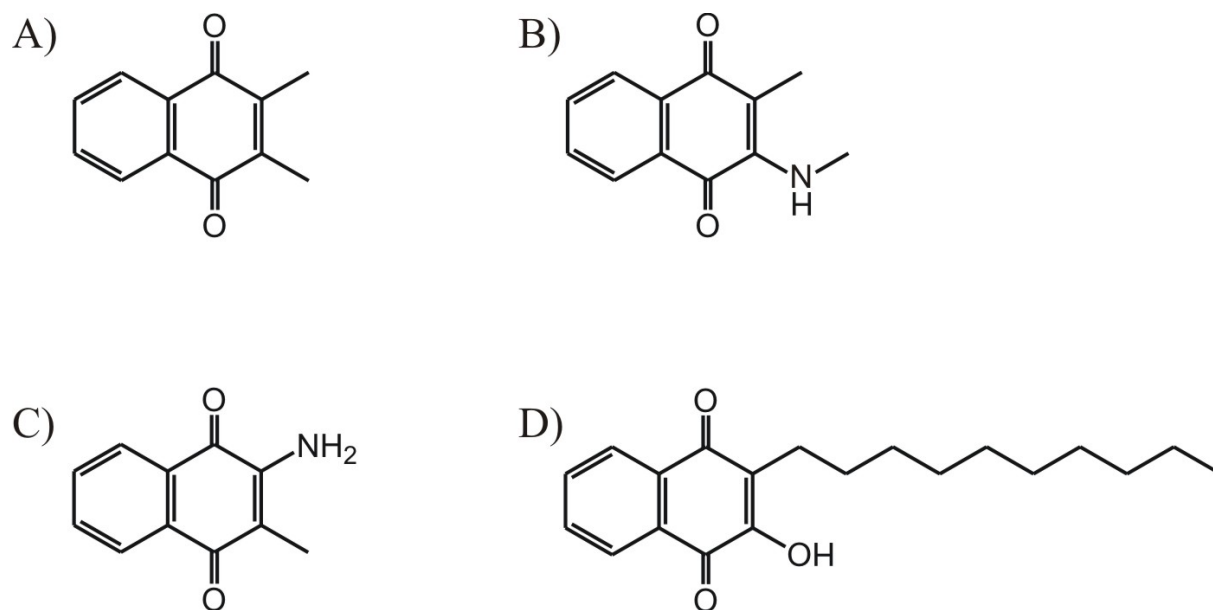

**Figure S4. Chemical structures of synthesised naphthoquinones.**

**A)** 2,3-Dimethyl-1,4-naphthoquinone (DMN)

**B)** 2-Methyl-3-methylamino-1,4-naphthoquinone (MMAN)

**C)** 2-Amino-3-methyl-1,4-naphthoquinone (AMN)

**D)** 2-Decyl-3-hydroxy-1,4-naphthoquinone (DHN)

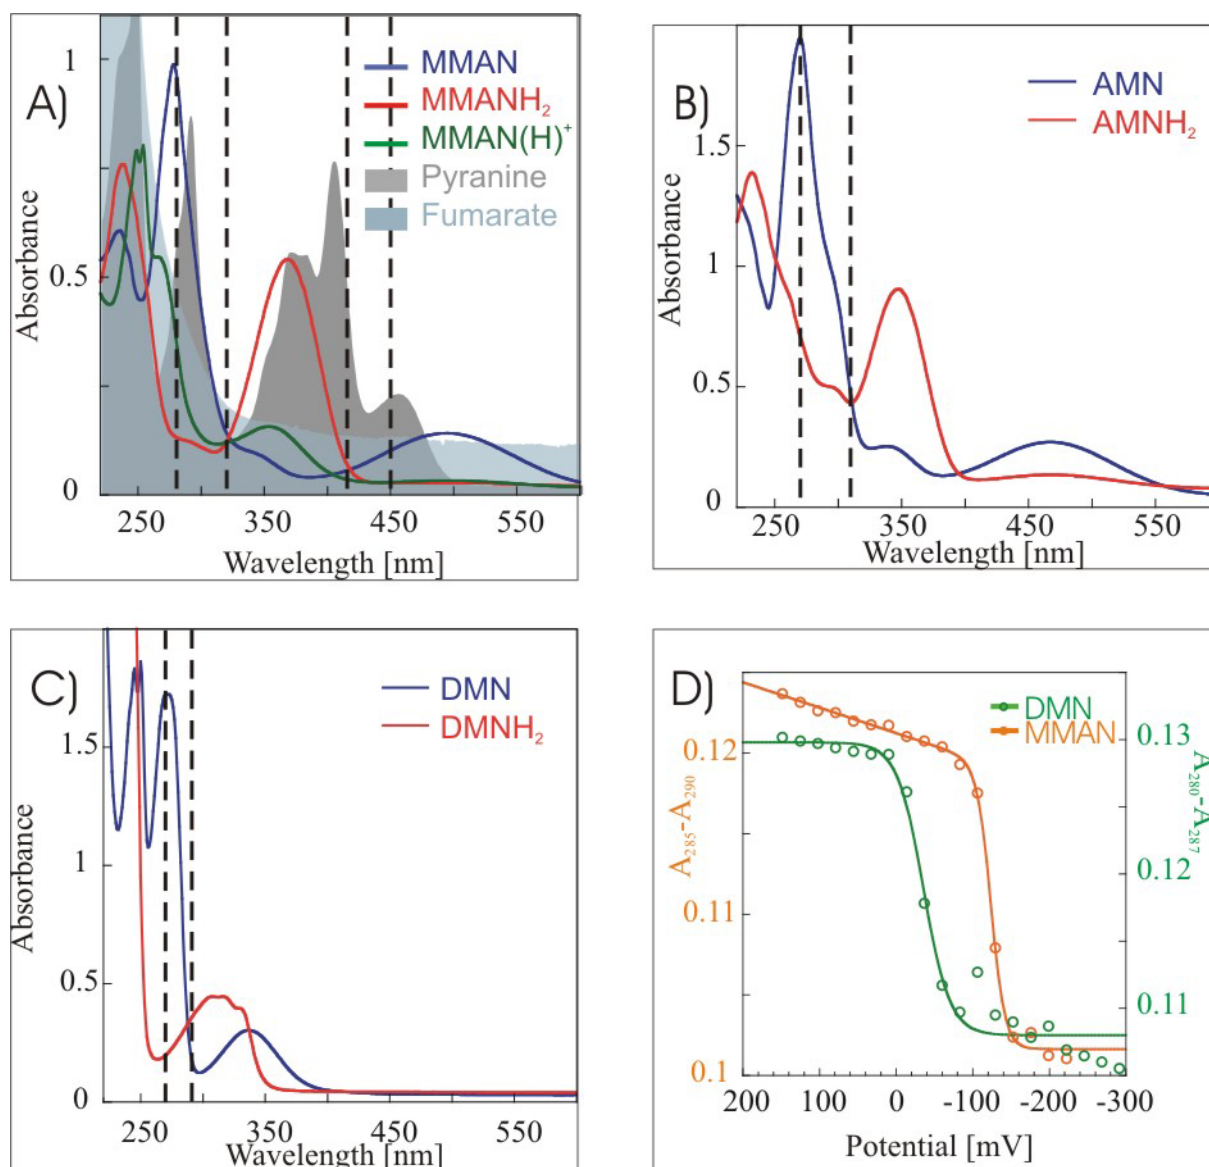

**Figure S5. UV/VIS Spectra of oxidised and reduced quinones and *in situ* redox titration of DMN and MMAN**

Spectra were recorded in 20 mM HEPES pH 7.5 buffer, the path length was 0.4 cm.

**A)** UV/VIS Spectra (recorded in H<sub>2</sub>O) of MMAN (blue)/ MMANH<sub>2</sub> (red, reduced with solid NaBH<sub>4</sub>,  $\Delta\epsilon_{280-320} = 27.6 \text{ mM}^{-1}\text{cm}^{-1}$ ) and other absorbance contributions in the pyranine/proteoliposome experiment shown in Figures 2A and 2B. UV/VIS Spectrum of MMANH<sup>+</sup> recorded in 36% HCl ( $\Delta\epsilon_{280-320} (\text{MMANH}^+/\text{MMANH}_2) = 5.8 \text{ mM}^{-1}\text{cm}^{-1}$ ). The pyranine absorbance is shown as grey area and fumarate absorbance is shown as transparent blue area. The spectra are scaled to the absorption of MMAN at  $\lambda$  280 nm and shown in arbitrary units.

**B)** UV/VIS Spectra of AMN / AMNH<sub>2</sub> ( $\Delta\epsilon_{270-310} = 24.6 \text{ mM}^{-1}\text{cm}^{-1}$ )

**C)** UV/VIS Spectra of DMN / DMNH<sub>2</sub> ( $\Delta\epsilon_{270-290} = 15.2 \text{ mM}^{-1}\text{cm}^{-1}$ )

**D)** *In situ* redox titration of QFR-bound DMN ( $\Delta\epsilon_{280-287} = 9.9 \text{ mM}^{-1}\text{cm}^{-1}$ ) and MMAN ( $\Delta\epsilon_{285-290} = 5.0 \text{ mM}^{-1}\text{cm}^{-1}$ ).

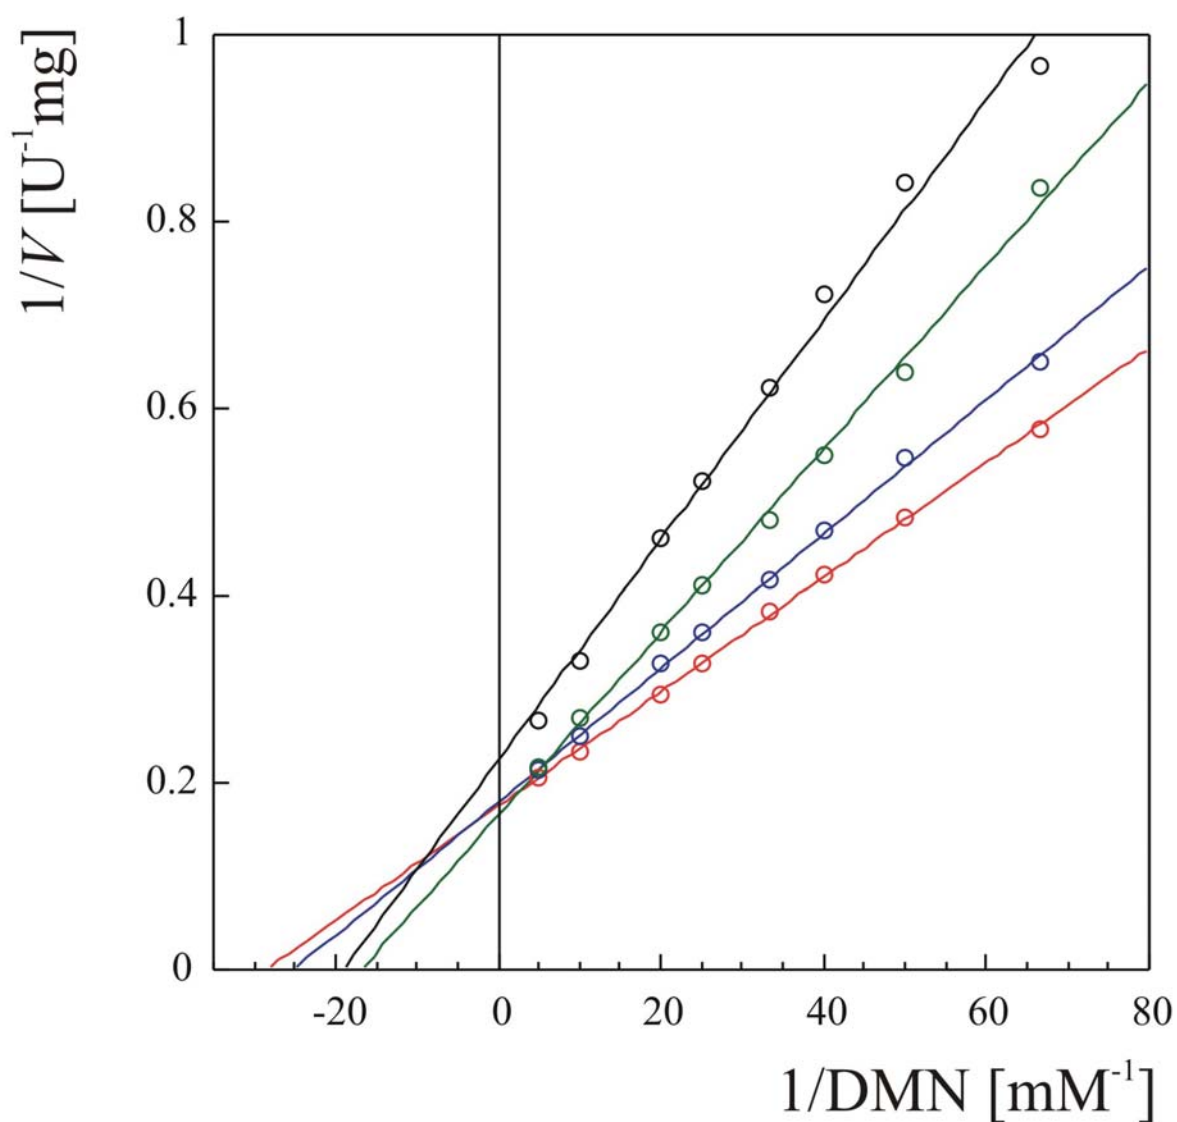

**Figure S6.** Double reciprocal plot of  $\text{DMNH}_2$  oxidation by fumarate as catalysed by wild-type QFR from *W. succinogenes*, demonstrating the competitive nature of the inhibitor 2-decyl-3-hydroxy-1,4-naphthoquinone (DHN). The specific activities were determined as described in the absence of DHN (red) and in the presence of 1  $\mu\text{M}$  (blue) 2  $\mu\text{M}$  (green), and 4  $\mu\text{M}$  DHN (black), respectively.



**Figure S7.** Titration of pyranine. **A)** Normalised UV-Vis spectra of pyranine ( $A/A_{415}$ ) upon addition of HCl. (5 mM HEPES, 0.2 mM pyranine, addition of 1  $\mu$ l 120 mM HCl per step). The isosbestic point ( $\lambda = 415$  nm) and the indicator wavelength ( $\lambda = 450$  nm) are indicated by dashed lines. The normalization of the spectra followed the same procedure as in Figure 2B, by division by the isosbestic point ( $IP_{415}$ ) at  $\lambda=415$  nm.

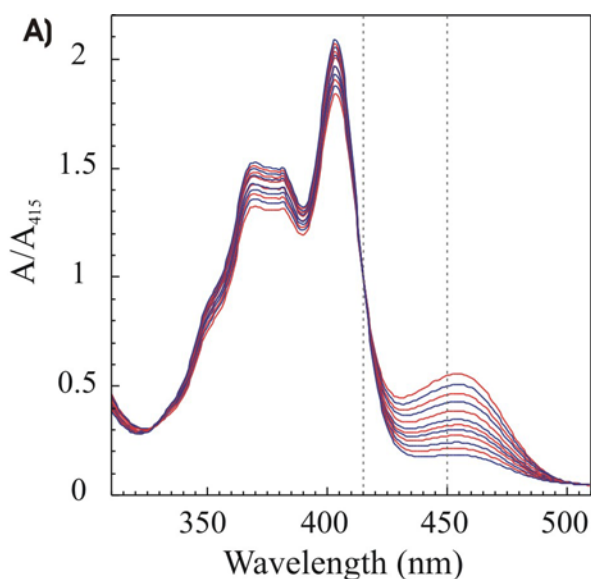

**B)** The dependence of the absorbance ratio of  $A_{450}/A_{415}$  on added HCl at constant buffer concentration, varying the pyranine concentration. (5 mM HEPES, pyranine concentration as indicated in the plot inset) The normalized and averaged slope is  $0.243 \text{ mM}_{\text{H}^+}^{-1}$  at 5 mM HEPES. **C)** The dependence of the absorbance ratio of  $A_{450}/A_{415}$  on added HCl at constant pyranine concentration, varying buffer concentration. (HEPES concentration as indicated in the plot inset, 0.5 mM pyranine). The normalized slopes are:  $0.259 \text{ mM}_{\text{H}^+}^{-1}$  at 5 mM HEPES,  $0.166 \text{ mM}_{\text{H}^+}^{-1}$  at 10 mM HEPES,  $0.096 \text{ mM}_{\text{H}^+}^{-1}$  at 20 mM HEPES,  $0.041 \text{ mM}_{\text{H}^+}^{-1}$  at 50 mM HEPES.

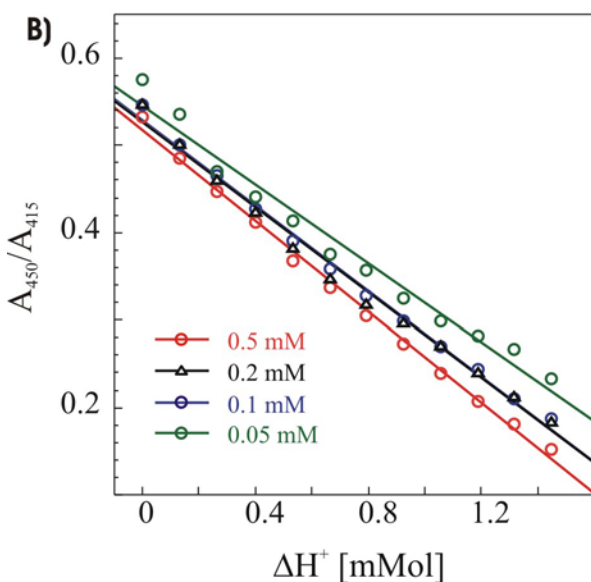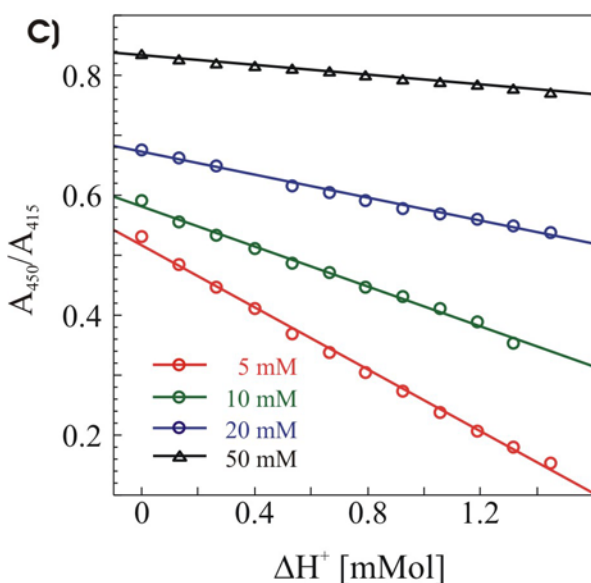

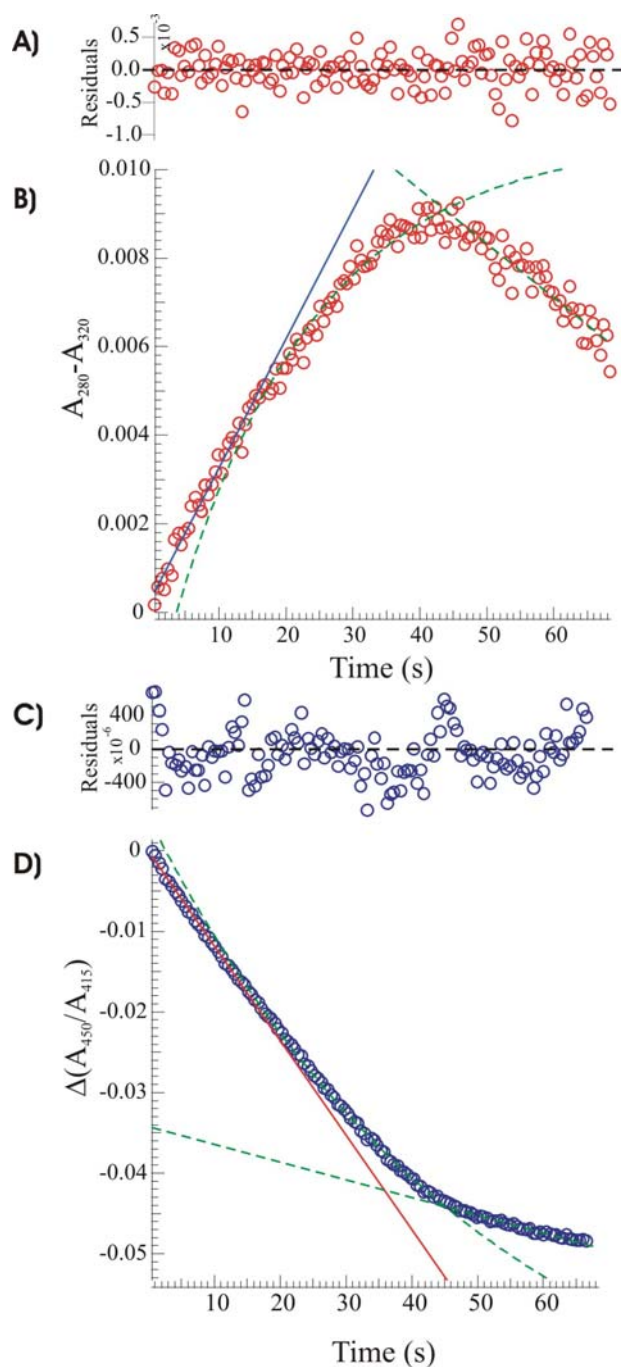

**Figure S8. Curve fitting of Figures 2A and B**

**A)** Residual plot for the fit in panel B.

**B)** Apparent progress curve of MMANH<sub>2</sub> oxidation by proteoliposomal E180Q-QFR taken from Fig.2 A and fitted to linear model equation S1 (see Table SII; shown as blue line; points 0-28), exponential model equation S2 (shown as green dashed line; points 29-87) and linear model equation S1 (shown as green dashed line; points 88-135).

**C)** Residual plot for the fit in panel D.

**D)** Progress curve of the acidification of the interior of the proteoliposomes upon MMANH<sub>2</sub> oxidation by proteoliposomal E180Q-QFR taken from Fig.2 B and fitted accordingly to panel B. Linear model S1 (see Table SII; shown as red line; points 0-28), exponential model S2 (shown as green dashed line; points 29-87) and linear model S1 (shown as green dashed line; points 88-end).



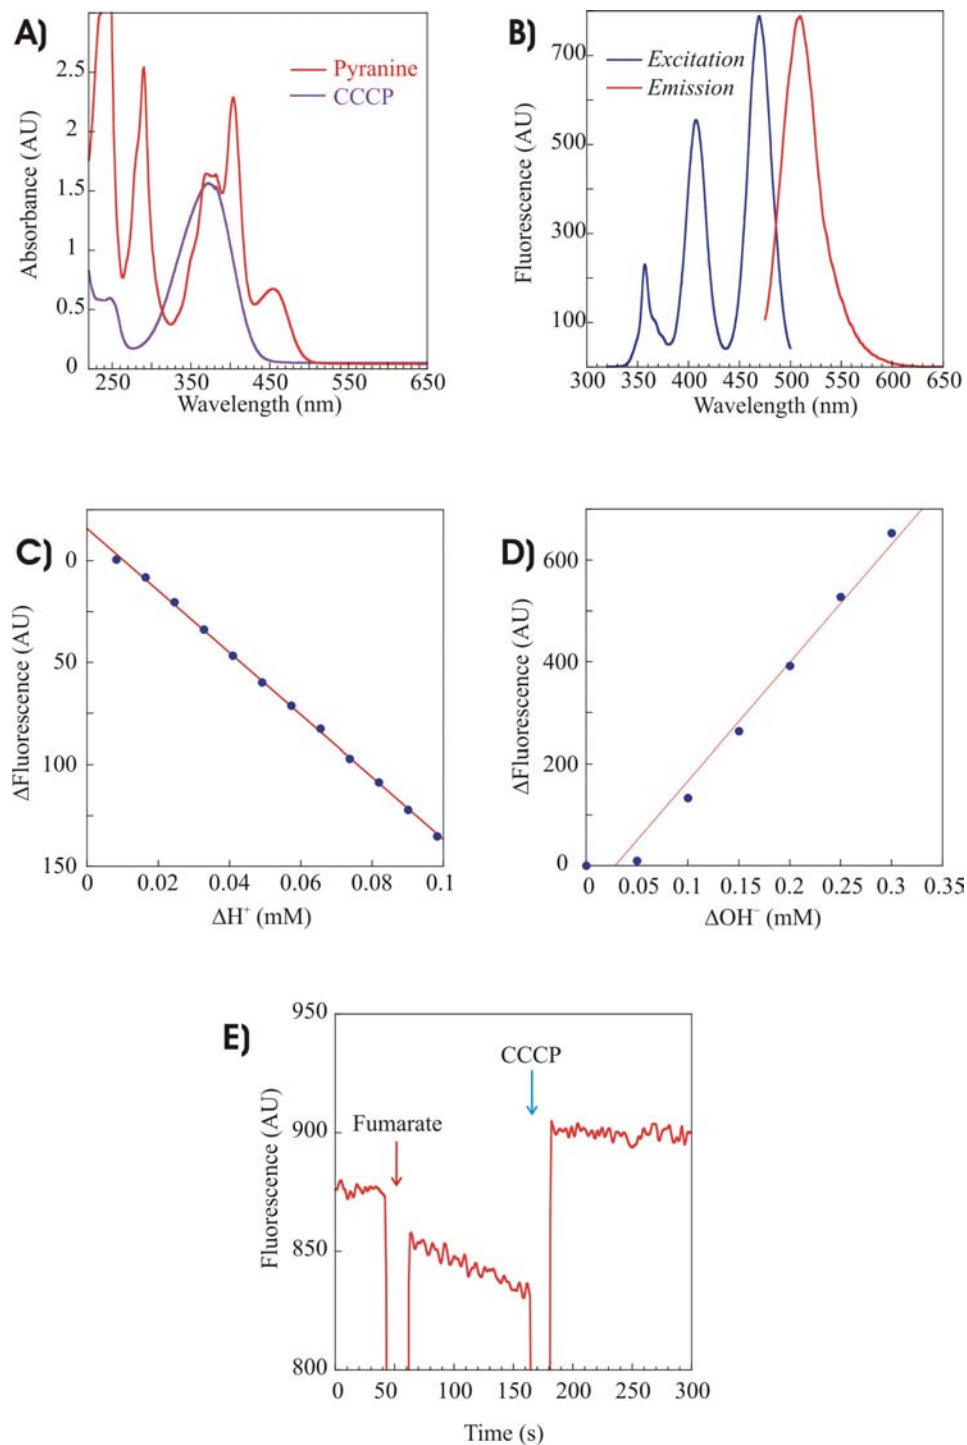

**Figure S9. Spectroscopic composition of pyranine fluorescence measurements**

**A)** Superposition of the UV/Vis absorption spectra of pyranine (red) and CCCP (purple). **B)** Excitation and emission spectra of pyranine (3  $\mu$ M) in HEPES buffer (pH 7.3) were recorded in  $1 \times 0.4$  cm quartz cells, slits: 2.5 nm  $\times$  3.5 nm. Excitation was monitored with respect to  $\lambda_{em} = 510$  nm. Emission spectrum taken at  $\lambda_{exc} = 470$  nm. **C)** Titration of the liposomes with HCl. **D)** Titration of the liposomes with NaOH. **E)** Fluorescence monitoring of the acidification of the interior of proteoliposomes with reconstituted E180Q QFR catalysing MMANH<sub>2</sub> oxidation by fumarate. The reaction was started by the addition of 20  $\mu$ M fumarate (red arrow); the protonophore CCCP was added subsequently (blue arrow). Reaction conditions same as Fig. 2 A + B.  $\lambda_{exc} = 470$  nm,  $\lambda_{em} = 510$  nm, slits: 2.5 nm  $\times$  4.0 nm.

## 2. Supplementary Methods

### 2.1. Synthesis of naphthoquinones.

**General Remarks.** NMR spectra were recorded on spectrometers operating at a  $^1\text{H}$  frequency of 250 MHz. Elementary analyses were measured on a Foss Heraeus CHN-O-RAPID instrument. IR spectra were recorded on a PERKLIN ELMER spectrometer. Low resolution electrospray mass spectra (ESI) were recorded on a Fisons VG Platform II spectrometer. All reactions were monitored by thin-layer chromatography (TLC), performed on silica gel POLYgram® (Macherey-Nagel). Chromatographic purifications were done with Merck silica gel 60.

**Synthesis of 2,3-Dimethyl-1,4-naphthoquinone (DMN).** DMN was synthesized following literature procedures (Wurm and Geres, 1984) as described earlier (Lancaster *et al*, 2005). The crude product was purified by silica chromatography (chloroform:cyclohexane 10:1),  $R_f = 0.46$ .

$^1\text{H-NMR}$  (250.13 MHz,  $\text{CDCl}_3$ ):  $\delta$  [ppm]= 8.2 – 7.95 (m, 2H, aromatic protons), 7.65 – 7.58 (m, 2H, aromatic protons), 2.09 (s, 6H,  $\text{CH}_3$ ).

$^{13}\text{C-NMR}$  (62.9 MHz,  $\text{CDCl}_3$ ):  $\delta$  [ppm]= 184.9 (C=O), 143.4 (C), 133.3 (CH), 132.1 (C), 126.2 (CH), 12.9 ( $\text{CH}_3$ ).

IR (KBr pellet): 1659.45;1592.91;1372.10;1295.93;790.67;699.07  $\text{cm}^{-1}$ .

Anal.calcd for  $\text{C}_{12}\text{H}_{10}\text{O}_2$ : C 77.4, H 5.41; Found: C 77.28, H 5.49

$E_0 = -870$  mV (in dimethoxyethane/tetrabutylammoniumperchlorat on platinum working and counter electrodes. potential is quoted vs. Ag/AgCl reference electrode, sweep rate 50 mV/s), 20 mV lower than K2.

**Synthesis of 2-Methyl-3-methylamino-1,4-naphthoquinone (MMAN).** MMAN was synthesized following literature procedures (Ohta *et al*, 1994). The crude product was purified by silica chromatography ( $\text{CH}_2\text{Cl}_2$ );  $R_f = 0.53$ .

$^1\text{H-NMR}$  (250.13 MHz,  $\text{CDCl}_3$ ):  $\delta$ [ppm]= 8.2 – 7.8 (m, 2H, aromatic protons), 7.7 – 7.4 (m, 2H, aromatic protons), 5.7 (s br,1H, NH), 3.15 (s, 3H,  $\text{NHCH}_3$ ), 2.19 (s, 3H,  $\text{CH}_3$ ).

$^{13}\text{C-NMR}$  (62.9 MHz,  $\text{CDCl}_3$ ):  $\delta$ [ppm]= 183.0; 182.0 (C=O), 146.9; 133.5; 130.2; 111.9 (C), 134.3; 131.7; 126.1; 125.9 (CH), 32.8; 10.9 ( $\text{CH}_3$ ).

IR(KBr pellet): 3366.14;1669.09;1599.66;1563.02;1519.63;1343.18;1283.39 and 728.96  $\text{cm}^{-1}$ .

MS (ESI):  $m/z$ : 201.8  $\text{M}^+$

Anal.calcd. for C<sub>12</sub>H<sub>11</sub>NO<sub>2</sub>: C 71.63, H 5.51, N 6.96; Found: C 71.82, H 5.26, N 6.92.

E<sub>0</sub>= -930 mV (in dimethoxyethane/tetrabutylammoniumperchlorat on platinum working and counter electrodes. potential is quoted vs. Ag/AgCl reference electrode, sweep rate 50 mV/s), 80 mV lower than K2.

**2-Amino-3-methyl-1,4-naphthoquinone (AMN).** AMN was synthesized by a nitration/reduction sequence from 2-methyl-1,4-naphthoquinone. The nitration (Boyle *et al*, 1984) was carried out using a (1:1) mixture of concentrated HNO<sub>3</sub> and concentrated H<sub>2</sub>SO<sub>4</sub> heated to 60°C:

2-Nitro-3-methyl-1,4-naphthoquinone: <sup>1</sup>H-NMR (250.13 MHz, CDCl<sub>3</sub>): δ[ppm]= 8.1 – 8.0 (m, 2H, aromatic protons), 7.8 – 7.7 (m, 2H, aromatic protons), 2.1 (s, 3H, CH<sub>3</sub>).

<sup>13</sup>C-NMR (62.9 MHz, CDCl<sub>3</sub>): δ[ppm]=183.5 (C=O), 175.1 (CNO<sub>2</sub>), 137.0; 131.3; 130.0 (C), 135.1;134.9;127.3;127.0 (CH), 11.8 (CH<sub>3</sub>).

Anal.calcd for C<sub>12</sub>H<sub>7</sub>NO<sub>4</sub>: C 60.83, H 3.25, N 6.45; Found: C 60.62, H 3.39, N 6.30.

The reduction of the resulting 2-nitro-3-methyl-1,4-naphthoquinone gave the desired product. To a suspension of 0.1 g (0,46 mmol) of 2-nitro-3-methyl-1,4-naphthoquinone in 1.3 ml water 0.26g (1,48 mmol) sodium hydrosulfite was added; the reaction was refluxed for 2h. After cooling to room temperture, the precipitate was filtered and dried to give 0.083 g (97%) pure amine as a red powder.

<sup>1</sup>H-NMR (250.13 MHz, CDCl<sub>3</sub>): δ[ppm]= 8.0 – 7.9 (m, 2H, aromatic protons), 7.6 – 7.4 (m, 2H, aromatic protons), 4.8 (s, br, 2H, NH<sub>2</sub>), 1.94 (s, 3H, CH<sub>3</sub>).

<sup>13</sup>C-NMR (62.9 MHz, CDCl<sub>3</sub>): δ [ppm]=182.9; 181.2 (C=O), 145.3; 133.2; 130.4; 113.2 (C), 134.2, 132.0, 126.2, 125.8 (CH), 9.2 (CH<sub>3</sub>).

IR (KBr pellet) 3643.84;3460.63;3351.68;1676.8;1614.13;1582.31;1359.57;723.18 cm<sup>-1</sup>.

E<sub>0</sub>= -900 mV (in Dimethoxyethane/tetrabutylammoniumperchlorat on platinum working and counter electrodes. potential is quoted vs. Ag/AgCl reference electrode, sweep rate 50 mV/s) 50 mV lower than K2.

MS (ESI): m/z: 187.7 M<sup>+</sup>

**2-decyl-3-hydroxy-1,4-naphthoquinone.** 2-decyl-3-hydroxy-1,4-naphthoquinone was synthesized by an alkylation/epoxidation and acid catalyzed epoxide cleavage of 1,4-naphthoquinone. The decyl side chain was introduced by a radical Hundsdiecker decarboxylation of undecanoic acid using silver nitrate and peroxydisulfate. A mixture of 1,4-

naphthoquinone 2 g (12,6 mmol), undecanoic acid 2,8 g (15,1 mmol) and silver nitrate 0,5 g (2,9 mmol) in 60 ml acetonitrile/water mixture (5:1) was heated at 80°C, at this temperature a solution of 5.7 g (25 mmol) ammonium persulfate in 20 ml water was slowly added. After 2h, the mixture was diluted with water and extracted twice with dichloromethane, dried and concentrated under reduced pressure. The crude product was purified by silica chromatography (hexane:ethylacetate 4:1) to give 0.695 g (18,5 %) of 2- decyl-1,4-naphthoquinone.

Rf=0.5, <sup>1</sup>H-NMR (250.13 MHz, CDCl<sub>3</sub>):

δ= 8.1 – 8.0 (m, 2H, aromatic protons), 7.8 – 7.7 (m, 2H, aromatic protons), 6.8 (s, 1H, CH), 2.6 (t, *J* = 7.8 Hz, 2H, CH<sub>2</sub>), 1.6 – 1.2 (m, 16H, CH<sub>2</sub>), 0.9 (t, *J* = 6,5 Hz, 3H, CH<sub>3</sub>).

<sup>13</sup>C-NMR (62.9 MHz, CDCl<sub>3</sub>) δ=185.2 (C=O), 152.0; 132.3; 132.1(C), 134.7; 133.6; 126.6; 126.0 (CH), 31.8; 29.5; 29.5; 29.4; 29.3; 28.0, 22.6 (CH<sub>2</sub>), 14.1 (CH<sub>3</sub>).

IR(KBr pellet): 2917.77;2851.24;1664.27;1621.84;1592.91;1335.46;1305.57;1256.40;930.49 and 781.99 cm<sup>-1</sup>.

Anal.Calcd. for C<sub>20</sub>H<sub>26</sub>O<sub>3</sub>: C 80.5, H 8.78; Found: C 80.25, H 8,76.

In the second step, 2- decyl-1,4-naphthoquinone was converted to 1a-decyl-1a, 7a Dihydro-naphth[2,3b]oxirene-2,7-dione via Δ<sup>2</sup> epoxidation. 0.322 g (1.07 mmol) of 2- decyl-1,4-naphthoquinone was dissolved in ethanol (1 ml), a solution of alkaline hydrogen peroxide (0.5 ml of 30% H<sub>2</sub>O<sub>2</sub>, 20 mg sodium carbonate in 0.2 ml water) was added. After 1h stirring at room temperature, it was diluted with water and extracted twice with dichloromethane, dried and concentrated under reduced pressure to give 0.28g (90%) of the epoxide.

2-decyl-1a, 7a Dihydro-naphth[2,3b]oxirene-2,7-dione

Rf=0.6 (hexane:ethylacetate 6:1).

<sup>1</sup>H-NMR (250.13 MHz, CDCl<sub>3</sub>): δ [ppm]= 8.0 – 7.9 (m, 2H, aromatic protons), 7.8 – 7.7 (m, 2H, aromatic protons), 3.8 (s, 1H, CH), 2.3 – 2.2 (m, 1H, CH<sub>2</sub>), 1.9 – 1.8 (m, 1H, CH<sub>2</sub>), 1.5 – 1.4 (m, 16H, CH<sub>2</sub>), 0.9 (t, *J* = 6,5 Hz, 3H, CH<sub>3</sub>).

<sup>13</sup>C-NMR (62.9 MHz, CDCl<sub>3</sub>): δ [ppm]=192.0 ; 191.7 (C=O), 132.4; 131.8; 64.0 (C), 134.5; 134.2; 127.4; 126.7; 60.1 (CH), 31.8; 29.6; 29.5; 29.4; 29.3;29.3; 28.2; 24.4; 22.6 (CH<sub>2</sub>), 14.1 (CH<sub>3</sub>).

In the last step, the epoxide was cleaved under acetic condition to give the desired product. 0.250 g (0.79 mmol) epoxide was dissolved in 1 ml concentrated sulfuric acid and stirred at

room temperature for 10 min. It was diluted in water and extracted twice with dichloromethane, dried and concentrated under reduced pressure. The crude product was purified by silica chromatography (hexane:ethylacetate 6:1) to give 0.121 g (49 %) of 2-decyl-3-hydroxy-1,4-naphthoquinone;  $R_f=0.5$  (hexane:ethylacetate 6:1).

$^1\text{H-NMR}$  (250.13 MHz,  $\text{CDCl}_3$ ):  $\delta$  [ppm]= 8.0 – 7.9 (m, 2H, Aromat), 7.7 – 7.5 (m, 2H, Aromat), 7.2 (s, 1H, OH), 2.5 – 2.4 (t, 2H,  $\text{CH}_2$ ), 1.5 – 1.2 (m, 16H,  $\text{CH}_2$ ), 0.7 (t,  $J = 6,5$  Hz, 3H,  $\text{CH}_3$ ).

$^{13}\text{C-NMR}$  (62.9 MHz,  $\text{CDCl}_3$ ):  $\delta$  [ppm]=184.3 ; 181.4 (C=O), 153.0; 132.9; 129.4; 124.8 (C), 134.8; 132.8; 126.7; 126.0 (CH), 31.9; 29.8; 29.6; 29.5; 29.4; 29.3; 28.3; 23.4; 22.6 ( $\text{CH}_2$ ), 14.1 ( $\text{CH}_3$ ).

IR(KBr pellet): 3366.14;2916.81;2852.2;1663.3;1640.16;1591.95;1347.03;1267.00;1213.97 and  $722.21\text{ cm}^{-1}$ .

Anal.Calcd. for  $\text{C}_{20}\text{H}_{26}\text{O}_3$ : C 76.4, H 8.3; Found: C 75.12, H 8,20.

## 2.2. *In situ* redox titration of QFR-bound naphthoquinones

Equimolar amounts (3  $\mu\text{M}$ ) of *W. succinogenes* QFR and DMN were added to 950  $\mu\text{l}$   $\text{N}_2$ -flushed 20 mM HEPES buffer, pH 7.3. Sodium dithionite (30 mM in 1 M HEPES buffer, pH 7.3) was added in 1  $\mu\text{l}$  increments. The solution was equilibrated for 90 s under an argon atmosphere. UV-Vis spectra were recorded from 650 nm to 230 nm. DMN and MMAN reduction were monitored by calculating the absorption differences  $\Delta A_{280-A_{287}}$  and  $\Delta A_{290-A_{295}}$ , respectively.

## 2.3. Calibration of pyranine titration

The spectra used for calculation of the acidification of the proteoliposome interior were normalized to the isosbestic point ( $IP_{415}$ ) at  $\lambda = 415$  nm, Fig. S7A). This method is based on the representation of absorbance change as the ratio of the absorbance at  $IP_{415}$  ( $A_{415}$ ) to the absorbance at the indicator wavelength ( $A_{450}$ ), Fig. S7B, C). Unlike the absorbance at the indicator wavelength, the absorbance at  $IP_{415}$  is independent of the  $\text{H}^+$  concentration. The  $\Delta\text{pH}$  ( $= \log_{10}((\Delta c[\text{H}^+] \cdot V_i)/10^{-7.5})$  with  $\Delta c[\text{H}^+]=\Delta (A_{450}/A_{415})/0.243$ ) was calculated from the amplitude of the pyranine signal using the conversion factor of  $0.243\text{ mM}_{\text{H}^+}^{-1}$ . (see Figure S7B). The proteoliposome exterior is buffered with 50 mM HEPES so that all the signal is contributed from the proteoliposomal interior.

The calibration of the entrapped pyranine fluorescence (Figure S9) as a function of pH was performed by diluting pyranine loaded vesicles in buffer directly in a fluorescence cuvette.

The liposomes were then permeabilized to protons through the addition of 12  $\mu\text{M}$  CCCP to the medium. Valinomycin was added to sustain the ionic strength. The presence of the ionophore certified that the pH inside and outside the vesicles were balanced throughout the entire experiment. After adding small aliquots of 0.1 M NaOH or 0.1 M HCl to the fluorescence intensity was measured (Figures S9 C and D).

#### **2.4 Determination of the $\text{H}^+/\text{e}^-$ ratio**

The  $\text{H}^+/\text{e}^-$  ratio was calculated from the ratio of the turnover rates in the steady-state phase ( $\Delta A_c$ ) of the MMANH<sub>2</sub> oxidation and the acidification of the proteosomal interior (Tab.SII).



### 3. Supplementary Tables

**Table SI. Data collection and refinement statistics**

| <b>Data set</b>                                        |                                              |  |
|--------------------------------------------------------|----------------------------------------------|--|
| X-ray source                                           | ESRF (Grenoble) ID14-3 / ID14-1              |  |
| Wavelength [Å]                                         | 0.931 / 0.934                                |  |
| Space group                                            | P2 <sub>1</sub>                              |  |
| Unit cell parameters [Å]                               | a= 85.1 b = 188.8 c = 117.8 $\beta$ = 104.5° |  |
| Resolution* [Å]                                        | 28.75 – 1.78 (1.84-1.78)                     |  |
| Unique reflections*                                    | 317,968 (23,725)                             |  |
| R <sub>sym</sub> *                                     | 0.098 (0.346)                                |  |
| Completeness* [%]                                      | 92.3 (69.0)                                  |  |
| <I/sig(I)>*                                            | 16.5 (3.0)                                   |  |
| Redundancy*                                            | 3.8 (2.6)                                    |  |
| <b>Refinement</b>                                      |                                              |  |
| Resolution*                                            | 28.70 – 1.78 (1.82 – 1.78)                   |  |
| R <sub>cryst</sub> *                                   | 0.229 (0.360)                                |  |
| R <sub>free</sub> *                                    | 0.237 (0.375)                                |  |
| Protein non-hydrogen atoms                             | 18,295                                       |  |
| Heterogen non-hydrogen atoms                           | 404                                          |  |
| Solvent non-hydrogen atoms                             | 990                                          |  |
| B values                                               |                                              |  |
| From Wilson plot [Å <sup>2</sup> ]                     | 23.2                                         |  |
| Mean B value [Å <sup>2</sup> ]                         | 38.8                                         |  |
| Coordinate error from cross-validated Luzzati plot [Å] | 0.24                                         |  |
| R.m.s deviations                                       |                                              |  |
| Bond lengths [Å]                                       | 0.007                                        |  |
| Bond angles [°]                                        | 1.3                                          |  |
| Dihedral angles [°]                                    | 21.2                                         |  |
| Improper angles                                        | 1.65                                         |  |

\* Values in parentheses apply to highest resolution shell.

**Table SII. Rate constants as obtained from the respective fit to the kinetic models indicated.**

Table SII

| Experiment                                                | Figure:        | $\Delta A_c$<br>( $\mu\text{mol}\cdot\text{s}^{-1}$ ) | $k_{\text{app}}$<br>( $\mu\text{mol}\cdot\text{s}^{-1}$ ) | $\Delta A_c^*$<br>( $\mu\text{mol}\cdot\text{s}^{-1}$ ) |
|-----------------------------------------------------------|----------------|-------------------------------------------------------|-----------------------------------------------------------|---------------------------------------------------------|
| DMNH <sub>2</sub><br>Oxidation in the absence<br>of CCCP  | 1C left<br>1D  | $9.7\text{e-}03 \pm 9.6\text{e-}04$                   | -                                                         | $\ll 0.01$                                              |
| DMNH <sub>2</sub><br>Oxidation in the<br>presence of CCCP | 1C right<br>S3 | $36.28 \pm 0.052$                                     | $7.39 \pm 0.136$                                          | -                                                       |
| MMANH <sub>2</sub><br>Oxidation                           | 2A             | $20.00 \pm 0.007$                                     | $32.40 \pm 5.016$                                         | $-8.43 \pm 0.005$                                       |
| Pyranine signal upon<br>MMANH <sub>2</sub> oxidation      | 2B             | $-40.64 \pm 0.049$                                    | $-679.40 \pm 0.095$                                       | $-7.69 \pm 2.1\text{e-}5$                               |
| H <sup>+</sup> /e <sup>-</sup>                            |                | $2.03 \pm 0.056$                                      | -                                                         | -                                                       |

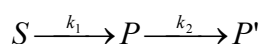

S: MMANH<sub>2</sub>; P: MMAN; P': MMANH<sup>+</sup>

$$A(t) = A_0 + \Delta A_c t \quad (\text{S1})$$

$$A(t) = A_0 + A_1 \cdot e^{(-k_{\text{app}} \cdot t)} \quad (\text{S2})$$

$A_0$ : extrapolated initial absorbance,  $A(t)$ : absorbance after time  $t$ ,  $t$ : time,  $\Delta A_c$ : constant slope in steady-state,  $\Delta A_c^*$ : second linear phase if reaction linear biphasic,  $k_{\text{app}}$ : apparent rate constant of the exponential process.

#### 4. Supplementary Discussion

Closer inspection of the DMNH<sub>2</sub> oxidation trace in Figure 1C recorded on the variant enzyme E180Q before the addition of CCCP reveals a slightly positive initial slope in the first 15 to 20 seconds of the reaction (Figure 1D). Assuming a proteoliposomal internal volume of 1.75  $\mu\text{l}$ , this initial slope corresponds to 0.23  $\mu\text{mol}$  of DMNH<sub>2</sub> oxidised. Taking into account an H<sup>+</sup>/e<sup>-</sup> ratio of 1.0 (Table I), we calculate that 0.46  $\mu\text{mol}$  H<sup>+</sup> were transferred into the proteoliposomes, which corresponds to a reduction in pH of 1.03 pH units. This inferred build-up of a transmembrane  $\Delta\mu$  appears to be sufficient to slow down the reaction, so that after 20 seconds, no further oxidation of DMNH<sub>2</sub> is observed.

After the CCCP addition the thermodynamic control is released. The progress curve of DMNH<sub>2</sub> oxidation in Figure S3B can be fitted disjointly to equations S1 and S2 (Table SII) which includes a linear and an exponential term. The linear term describes the Michaelis-Menten behavior; the exponential phase is very likely caused by the product accumulated in the vesicles which competes for the active site. These effects of product inhibition are currently under investigation.

The progress curves of MMANH<sub>2</sub> oxidation by fumarate as catalysed by proteoliposomal E180Q-QFR shown in Figure 2 A were fitted to linear and exponential equations (in Tab SII). Three phases are resolved. The first phase is a linear phase corresponding to normal Michaelis-Menten behaviour. The stoichiometry of MMANH<sub>2</sub> oxidation relative to H<sup>+</sup> release into the proteoliposomal interior, as calculated from the rate constants in this phase is 2.0 (Table SII). The second phase, an exponential phase, could be caused by a combination of increased  $\Delta\mu_{\text{H}^+}$  and the accumulation of the first product, MMAN, causing product inhibition after conversion of approximately 8  $\mu\text{mol}$  of MMANH<sub>2</sub>. This latter effect can also be observed in Figure S3 as determined for the oxidation of DMNH<sub>2</sub> by fumarate as catalysed by proteoliposomal E180Q-QFR in presence of the protonophore CCCP, but, also in this case, the net reaction stops after conversion of app. 9  $\mu\text{mol}$  DMNH<sub>2</sub>. Then, a second linear phase is established, which is attributed to a new steady state of the protonation of the MMAN to MMANH<sup>+</sup>, resulting in a decrease of the MMAN signal (see Fig. S5A). This event releases the limitations of the first exponential phase, due to removal of MMAN from the steady-state and the removal of H<sup>+</sup> from the equilibrium. The reaction proceeds as can be observed by the ongoing proton release into the proteolipome interior, however at one fifth of the initial rate. No protonation of DMN, the product of the reaction shown in Figure 1D, was observed. The oxidation of DMNH<sub>2</sub> by fumarate as

catalysed by proteoliposomal E180Q-QFR in sealed vesicles no longer proceeds significantly after a limited number of turnovers.

We attempted to measure the reversal of the initial pyranine signal after addition of the protonophore CCCP. This was not possible to show in the experiment shown in Figures 2 A and B, due to the strong absorbance of CCCP at the reference wavelength of 415 nm (Fig. S9A). In order to avoid any contribution from CCCP, we chose to monitor the acidification at a wavelength in the open optical window above 450 nm. Fluorescence measurements on proteoliposomal E180Q were performed at the same conditions as in Figures 2 A and B, though excitation wavelength was set to 470 nm and emission wavelength was set to 510 nm (Fig. S9B), where only little optical contributions from the reaction mixture are present. We calibrated the  $\Delta\text{pH}$ -dependent fluorescence in proteoliposomes (Fig. S9 C, D), but we can state the extent of  $\Delta\text{pH}$  only qualitatively due to the absorbance of MMAN at 470 nm (see Figure S5 A) which causes an inner filtering effect which is dependent on the redox ratio. In this experiment we could demonstrate that the addition of the uncoupler CCCP releases the generated  $\Delta\text{pH}$  (Fig. S9E). Although the fluorescence method is highly sensitive, it bears several disadvantages. For instance, an intrinsic calibration with respect to the specific activity of the enzyme is not possible, because these measurements cannot be carried out simultaneously to the monitoring of the quinol oxidation. In addition, its high sensitivity can be disturbed by chromophores absorbing at the excitation or emission wavelengths.

In Figure 2 C the E180Q QFR was not fully inhibited by 20  $\mu\text{M}$  DHN (86.6% inhibition), due to a different experimental geometry. DHN is an amphiphatic compound which is distributed between the aqueous buffer solution and lipophilic liposomal phase. By increasing the volume of the aqueous phase, the effective DHN concentration in the liposome is decreased.

## 5. Supplementary References

- Boyle PH, O'Mahony MJ, Cardin CJ (1984) Reaction of 2-Methyl-1,4-naphthoquinone and its 3-substituted derivatives with active methylene group anions and with diazo compounds. *J Chem Soc Perkin Trans I* **1984**: 593-601
- Nicholas KB, Nicholas HB Jr, Deerfield DW II (1997) GeneDoc: Analysis and visualization of genetic variation, *EMBNEW.NEWS* **4**: 14
- Notredame C, Higgins DG, Heringa J (2000) T-coffee: a novel method for fast and accurate multiple sequence alignment. *J Mol Biol* **302**: 205-217
- Ohta S, Hinata Y, Kawasaki I, Yamashita M (1994) Photo-oxidation of 2-methylamino-3-(1-piperidynyl)-1,4-naphthoquinone. *Chem Pharm Bull* **42**: 2360-2362
- Wurm G, Geres U (1984) Untersuchungen an 1,4-Naphthochinonen, 7. Mitt. C-Methylierung von 1,4-Naphthochinonen. *Arch Pharm* **317**: 606-609
